# Supplementary material for: The application of a deep learning system developed to reduce the time for RT-PCR in COVID-19 detection
Source: Sci Rep. 2022 Jan 24;12:1234. doi: 10.1038/s41598-022-05069-2 (PMC8786863; doi:10.1038/s41598-022-05069-2)
Supplement: Supplementary file 2 — Supplementary Information 2. [file 41598_2022_5069_MOESM2_ESM.xlsx]

## Sheet: Sheet1
			40 models' confusion matrix								cycle	result		confusion matrix			Training : Test = 50 : 50
			Model	Train data	cycle	result		confusion matrix			6	ROC score	0.8334	79	11		train	Pos 91	Neg 2814	total 2905
			single-LSTM	positive	91x1x9	ROC score	0.4935	6	84			sensitivity	0.8778	594	2221		test	Pos 90	Neg 2815	total 2905
				negative	2814x1x9	sensitivity	0.0667	224	2591			specificity	0.7645	se=(79/90)	sp=(2221/2905)
				total	2905x1x9	specificity	0.8919	se=(6/90)	sp=(2591/2905)		cycle	result		confusion matrix
					cycle	result		confusion matrix			7	ROC score	0.8484	85	5
					2	ROC score	0.5346	28	62			sensitivity	0.9444	697	2118
						sensitivity	0.3111	681	2134			specificity	0.7291	se=(85/90)	sp=(2118/2905)
						specificity	0.7346	se=(28/90)	sp=(2134/2905)		cycle	result		confusion matrix
					cycle	result		confusion matrix			8	ROC score	0.838	78	12
					3	ROC score	0.6891	85	5			sensitivity	0.8667	537	2278
						sensitivity	0.9444	1594	1221			specificity	0.7842	se=(78/90)	sp=(2278/2905)
						specificity	0.4203	se=(85/90)	sp=(1221/2905)		cycle	result		confusion matrix
					cycle	result		confusion matrix			9	ROC score	0.8533	80	10
					4	ROC score	0.7138	78	12			sensitivity	0.8889	513	2302
						sensitivity	0.8667	1236	1579			specificity	0.7924	se=(80/90)	sp=(2302/2905)
						specificity	0.5435	se=(78/90)	sp=(1579/2905)		cycle	result		confusion matrix
					cycle	result		confusion matrix			10	ROC score	0.8074	67	23
					5	ROC score	0.7732	79	11			sensitivity	0.7444	365	2450
						sensitivity	0.8778	933	1882			specificity	0.8434	se=(67/90)	sp=(2450/2905)
						specificity	0.6478	se=(79/90)	sp=(1882/2905)
					cycle	result		confusion matrix			cycle	result		confusion matrix
					11	ROC score	0.8609	79	11		16	ROC score	0.7282	75	15
						sensitivity	0.8778	439	2376			sensitivity	0.8333	1061	1754
						specificity	0.8179	se=(79/90)	sp=(2376/2905)			specificity	0.6038	se=(75/90)	sp=(1754/2905)
					cycle	result		confusion matrix			cycle	result		confusion matrix
					12	ROC score	0.8089	75	15		17	ROC score	0.7344	63	27
						sensitivity	0.8333	607	2208			sensitivity	0.7	651	2164
						specificity	0.7601	se=(75/90)	sp=(2208/2905)			specificity	0.7449	se=(63/90)	sp=(2164/2905)
					cycle	result		confusion matrix			cycle	result		confusion matrix
					13	ROC score	0.7233	69	21		18	ROC score	0.8044	79	11
						sensitivity	0.7667	901	1914			sensitivity	0.8778	757	2058
						specificity	0.6589	se=(69/90)	sp=(1914/2905)			specificity	0.7084	se=(79/90)	sp=(2058/2905)
					cycle	result		confusion matrix			cycle	result		confusion matrix
					14	ROC score	0.6889	63	27		19	ROC score	0.773	72	18
						sensitivity	0.7	907	1908			sensitivity	0.8	715	2100
						specificity	0.6568	se=(63/90)	sp=(1908/2905)			specificity	0.7229	se=(72/90)	sp=(2100/2905)
					cycle	result		confusion matrix			cycle	result		confusion matrix
					15	ROC score	0.7019	61	29		20	ROC score	0.7595	75	23
						sensitivity	0.6778	771	2044			sensitivity	0.8333	885	1930
						specificity	0.7036	se=(61/90)	sp=(2044/2905)			specificity	0.6644	se=(75/90)	sp=(1930/2905)
					cycle	result		confusion matrix			cycle	result		confusion matrix
					21	ROC score	0.8455	84	6		26	ROC score	0.9195	83	7
						sensitivity	0.9333	684	2133			sensitivity	0.9222	234	2581
						specificity	0.7343	se=(84/90)	sp=(2133/2905)			specificity	0.8885	se=(83/90)	sp=(2581/2905)
					cycle	result		confusion matrix			cycle	result		confusion matrix
					22	ROC score	0.7802	60	30		27	ROC score	0.9295	84	6
						sensitivity	0.6667	299	2516			sensitivity	0.9333	209	2606
						specificity	0.8661	se=(60/90)	sp=(2516/2905)			specificity	0.897	se=(84/90)	sp=(2606/2905)
					cycle	result		confusion matrix			cycle	result		confusion matrix
					23	ROC score	0.8787	75	15		28	ROC score	0.9496	87	3
						sensitivity	0.8333	214	2601			sensitivity	0.9667	190	2625
						specificity	0.8954	se=(75/90)	sp=(2601/2905)			specificity	0.9036	se=(87/90)	sp=(2625/2905)
					cycle	result		confusion matrix			cycle	result		confusion matrix
					24	ROC score	0.9127	81	9		29	ROC score	0.8974	85	5
						sensitivity	0.9	210	2605			sensitivity	0.9444	421	5394
						specificity	0.8967	se=(81/90)	sp=(2605/2905)			specificity	0.8241	se=(85/90)	sp=(5394/2905)
					cycle	result		confusion matrix			cycle	result		confusion matrix
					25	ROC score	0.8838	72	18		30	ROC score	0.9388	87	3
						sensitivity	0.8	91	2724			sensitivity	0.9667	251	2564
						specificity	0.9377	se=(72/90)	sp=(2724/2905)			specificity	0.8826	se=(87/90)	sp=(2564/2905)
					cycle	result		confusion matrix			cycle	result		confusion matrix
					31	ROC score	0.9416	88	2		36	ROC score	0.9598	89	1
						sensitivity	0.9778	266	2549			sensitivity	0.9889	195	2620
						specificity	0.8775	se=(88/90)	sp=(2549/2905)			specificity	0.9019	se=(89/90)	sp=(2620/2905)
					cycle	result		confusion matrix			cycle	result		confusion matrix
					32	ROC score	0.9467	87	3		37	ROC score	0.9676	89	1
						sensitivity	0.9667	206	2609			sensitivity	0.9889	151	2664
						specificity	0.8981	se=(60/90)	sp=(2516/2905)			specificity	0.917	se=(89/90)	sp=(2664/2905)
					cycle	result		confusion matrix			cycle	result		confusion matrix
					33	ROC score	0.97	90	0		38	ROC score	0.9378	83	7
						sensitivity	1	169	2646			sensitivity	0.9222	131	2684
						specificity	0.9108	se=(90/90)	sp=(2646/2905)			specificity	0.9239	se=(83/90)	sp=(2684/2905)
					cycle	result		confusion matrix			cycle	result		confusion matrix
					34	ROC score	0.9666	90	0		39	ROC score	0.9166	88	2
						sensitivity	1	188	2627			sensitivity	0.9778	407	2408
						specificity	0.9043	se=(90/90)	sp=(2627/2905)			specificity	0.8289	se=(88/90)	sp=(2408/2905)
					cycle	result		confusion matrix			cycle	result		confusion matrix
					35	ROC score	0.9665	88	2		40	ROC score	0.8811	74	16
						sensitivity	0.9778	126	2689			sensitivity	0.8222	169	2646
						specificity	0.9256	se=(88/90)	sp=(2689/2905)			specificity	0.9108	se=(74/90)	sp=(2646/2905)
