# Supplementary material for: The application of a deep learning system developed to reduce the time for RT-PCR in COVID-19 detection
Source: Sci Rep. 2022 Jan 24;12:1234. doi: 10.1038/s41598-022-05069-2 (PMC8786863; doi:10.1038/s41598-022-05069-2)
Supplement: Supplementary file 3 — Supplementary Information 3. [file 41598_2022_5069_MOESM3_ESM.xlsx]

## Sheet: Sheet1
	Sensitivity	Specificity	AUROC	False Positive Rate	False Negative Rate	Sensitivity Reference	US PPV	US NPV	US Accuracy	Radar chart % US	Italy PPV	Italy NPV	Italy Accuracy	Radar chart % Italy	South Korea PPV	South Korea NPV	South Korea Accuracy	Radar chart % S KOREA
Model 01	6.67	92.04	49.35	7.96	93.33	89	8.52	89.87	83.51	29.9408	5.92	92.92	86.08	30.1941	0.23	99.72	91.81	30.6645
Model 02	31.11	75.81	53.46	24.19	68.89	89	12.5	90.83	71.34	28.3565	8.81	93.61	72.69	27.5654	0.36	99.75	75.68	25.3741
Model 03	94.44	43.37	68.91	56.63	5.56	89	15.63	98.6	48.48	23.5966	11.13	99.05	46.94	20.9143	0.46	99.96	43.52	14.7209
Model 04	86.67	56.09	71.38	43.91	13.33	89	17.99	97.43	59.15	28.5995	12.91	98.25	58.23	25.8042	0.55	99.93	56.18	18.9998
Model 05	87.78	66.86	77.32	33.14	12.22	89	22.74	98.01	68.95	35.1815	16.59	98.65	68.32	31.6993	0.73	99.95	66.91	22.6982
Model 06	87.78	78.9	83.34	21.1	12.22	89	31.61	98.31	79.79	44.913	23.8	98.85	79.52	40.3525	1.14	99.96	78.92	26.9759
Model 07	94.44	75.24	84.84	24.76	5.56	89	29.77	99.19	77.16	43.0115	22.27	99.45	76.58	38.4536	1.05	99.98	75.29	25.7051
Model 08	86.67	80.92	83.8	19.08	13.33	89	33.55	98.2	81.5	46.7741	25.44	98.78	81.32	42.0484	1.25	99.95	80.94	27.7202
Model 09	88.89	81.78	85.33	18.22	11.11	89	35.15	98.51	82.49	48.2941	26.81	98.99	82.27	43.345	1.34	99.96	81.8	28.0676
Model 10	74.44	87.03	80.74	12.97	25.56	89	38.95	96.84	85.77	51.3954	30.13	97.84	86.15	46.5751	1.57	99.92	87	29.955
Model 11	87.78	84.4	86.09	15.6	12.22	89	38.48	98.42	84.74	51.2937	29.71	98.92	84.64	46.0872	1.54	99.96	84.41	29.0718
Model 12	83.33	78.44	80.89	21.56	16.67	89	30.04	97.69	78.93	43.3878	22.49	98.43	78.78	39.1326	1.06	99.94	78.45	26.7646
Model 13	76.67	67.99	72.33	32.01	23.33	89	21.02	96.33	68.86	33.6853	15.25	97.49	68.6	30.7356	0.66	99.9	68.02	23.0201
Model 14	70	67.78	68.89	32.22	30	89	19.45	95.31	68	32.1915	14.03	96.78	67.93	29.6172	0.6	99.88	67.79	22.9049
Model 15	67.78	72.61	70.19	27.39	32.22	89	21.57	95.3	72.13	34.9515	15.67	96.78	72.27	32.1443	0.68	99.88	72.6	24.5619
Model 16	88.33	62.31	72.82	37.69	16.67	89	19.72	97.11	64.41	31.4668	14.24	98.03	63.78	28.5218	0.61	99.93	62.37	21.1055
Model 17	70	76.87	73.44	23.13	30	89	25.17	95.84	76.19	38.7735	18.52	97.15	76.39	35.4508	0.83	99.89	76.85	26.0775
Model 18	87.78	73.11	80.44	26.89	12.22	89	26.62	98.18	74.58	39.7371	19.69	98.76	74.13	35.7509	0.9	99.95	73.15	24.8904
Model 19	80	74.6	77.3	25.4	20	89	25.92	97.11	75.14	39.2052	19.13	98.03	74.98	35.5332	0.87	99.93	74.62	25.3621
Model 20	76.53	68.56	75.95	31.44	16.67	89	21.29	96.34	69.36	34.033	16.6	98.21	69.59	32.0664	0.67	99.91	68.58	23.2157
Model 21	93.33	75.72	84.55	24.23	6.67	89	29.93	99.03	77.48	43.186	22.44	99.34	77	38.6875	1.06	99.98	75.77	25.8726
Model 22	66.67	89.38	78.02	10.62	33.33	89	41.09	96.02	87.11	52.9637	32.03	97.28	87.79	48.2267	1.71	99.9	89.32	30.8221
Model 23	83.33	92.4	87.87	7.6	16.67	89	54.91	98.04	91.49	64.5892	45.15	98.66	91.76	58.835	2.95	99.95	92.37	32.6658
Model 24	90	92.54	91.27	7.46	10	89	57.27	98.81	92.29	66.8782	47.53	99.2	92.36	60.8899	3.24	99.97	92.53	32.9131
Model 25	80	96.77	88.38	3.23	20	89	73.33	97.76	95.09	78.1256	65.02	98.47	95.6	73.4405	6.43	99.94	96.72	36.4357
Model 26	92.22	91.69	91.95	8.31	7.78	89	55.21	99.07	91.74	65.411	45.45	99.37	91.72	59.3309	2.99	99.98	91.69	32.4675
Model 27	93.33	92.58	92.95	7.42	6.67	89	58.28	99.21	92.65	67.9114	48.56	99.46	92.63	61.8029	3.37	99.98	92.58	33.0169
Model 28	96.67	93.25	94.96	6.75	3.33	89	61.41	99.6	93.59	70.6179	51.82	99.73	93.49	64.4547	3.83	99.99	93.26	33.5507
Model 29	94.44	85.04	89.74	14.96	5.56	89	41.23	99.28	85.98	53.9145	32.17	99.51	85.7	48.2874	1.72	99.98	85.07	29.4119
Model 30	96.67	91.08	93.88	8.92	3.33	89	54.64	99.6	91.64	65.2557	44.88	99.73	91.74	59.1413	2.92	99.99	91.1	32.2236
Model 31	97.78	90.55	94.16	9.45	2.22	89	53.48	99.73	91.27	64.3901	43.73	99.82	91.06	58.1226	2.79	99.99	90.57	31.9592
Model 32	96.67	92.68	94.67	7.32	3.33	89	59.48	99.6	93.08	69.1046	49.8	99.73	92.96	62.8895	3.54	99.99	92.69	33.1672
Model 33	100	94	97	6	0	89	64.92	100	94.6	73.6448	55.57	100	94.42	67.4864	4.42	100	94.01	34.1951
Model 34	100	93.32	96.66	6.68	0	89	62.46	100	93.99	71.7187	52.93	100	93.79	65.4543	3.99	100	93.34	33.6848
Model 35	97.78	95.52	96.65	4.48	2.22	89	70.82	99.74	95.75	77.9824	61.13	99.83	95.68	71.6775	5.72	99.99	95.53	35.5681
Model 36	98.89	93.07	95.98	6.93	1.11	89	61.33	99.87	93.65	70.738	51.72	99.91	93.48	64.4724	3.81	100	93.09	33.4822
Model 37	98.89	94.64	96.76	5.36	1.11	89	67.2	99.87	95.06	75.3098	58.06	99.91	94.93	69.3229	4.87	100	94.65	34.7098
Model 38	92.22	95.35	93.78	4.65	7.78	89	68.77	99.1	95.03	75.8926	59.81	99.39	95.13	70.2974	5.22	99.98	95.34	35.1722
Model 39	97.78	85.54	91.66	14.46	2.22	89	42.9	99.71	86.77	55.5061	33.68	99.81	86.4	49.6505	1.84	99.99	85.58	29.662
Model 40	82.22	94	88.11	6	17.78	89	60.34	97.94	92.82	68.6708	50.7	98.6	93.17	63.031	3.66	99.95	93.96	33.67
							68.67	96.64	94.24	74.0503	59.68	97.71	94.79	69.1678	5.07	99.92	96.01	35.2889
							77.53	95.5	95.85	79.9635	69.97	98.98	96.31	77.324	7.76	99.96	97.34	37.5372
